# Supplementary material for: Development And Validation of A Novel Hypoxia- And Immune-Related Prognostic Signature For Bone And Soft Tissue Sarcoma Patients
Source: Research Square preprint supplement (doi:10.21203/rs.3.rs-639983/v1), 2021-07-01
Supplement: Supplementary file 1 [file 0abfa864c8485134049f7105.xlsx]

## Sheet: Sheet1
	Supplementary Table 4. General characteristics of the Gene Oncology terms of Biological Process differently enriched by marker genes in hypoxia-low group
	ID	Description	GeneRatio	BgRatio	pvalue	p.adjust	qvalue	Count
	GO:0005977	glycogen metabolic process	7/36	73/18866	7.38091e-11	4.16551e-08	2.97934e-08	7
	GO:0006073	cellular glucan metabolic process	7/36	74/18866	8.14106e-11	4.16551e-08	2.97934e-08	7
	GO:0044042	glucan metabolic process	7/36	74/18866	8.14106e-11	4.16551e-08	2.97934e-08	7
	GO:0044262	cellular carbohydrate metabolic process	10/36	294/18866	1.28861e-10	4.94504e-08	3.53689e-08	10
	GO:0006006	glucose metabolic process	9/36	214/18866	1.89655e-10	5.82241e-08	4.16442e-08	9
	GO:0006112	energy reserve metabolic process	7/36	86/18866	2.39174e-10	6.11886e-08	4.37646e-08	7
	GO:0044264	cellular polysaccharide metabolic process	7/36	101/18866	7.50254e-10	1.6452e-07	1.17671e-07	7
	GO:0019318	hexose metabolic process	9/36	254/18866	8.6489e-10	1.65951e-07	1.18695e-07	9
	GO:0005976	polysaccharide metabolic process	7/36	112/18866	1.55699e-09	2.65553e-07	1.89934e-07	7
	GO:0005996	monosaccharide metabolic process	9/36	296/18866	3.31332e-09	5.08594e-07	3.63767e-07	9
	GO:0016051	carbohydrate biosynthetic process	8/36	213/18866	5.33817e-09	7.44917e-07	5.32795e-07	8
	GO:0005978	glycogen biosynthetic process	5/36	46/18866	2.45412e-08	2.89775e-06	2.07259e-06	5
	GO:0009250	glucan biosynthetic process	5/36	46/18866	2.45412e-08	2.89775e-06	2.07259e-06	5
	GO:0015980	energy derivation by oxidation of organic compounds	8/36	278/18866	4.25394e-08	4.66414e-06	3.33599e-06	8
	GO:0005980	glycogen catabolic process	4/36	22/18866	7.96857e-08	8.15451e-06	5.83244e-06	4
	GO:0016052	carbohydrate catabolic process	7/36	200/18866	8.715e-08	8.36095e-06	5.98009e-06	7
	GO:0009251	glucan catabolic process	4/36	23/18866	9.63308e-08	8.6981e-06	6.22124e-06	4
	GO:0044247	cellular polysaccharide catabolic process	4/36	24/18866	1.1544e-07	9.84448e-06	7.04117e-06	4
	GO:0000272	polysaccharide catabolic process	4/36	26/18866	1.61975e-07	1.30859e-05	9.35957e-06	4
	GO:0033692	cellular polysaccharide biosynthetic process	5/36	71/18866	2.25247e-07	1.72877e-05	1.23649e-05	5
	GO:0071453	cellular response to oxygen levels	7/36	235/18866	2.6115e-07	1.90888e-05	1.36531e-05	7
	GO:0001666	response to hypoxia	8/36	359/18866	3.02216e-07	2.10865e-05	1.50819e-05	8
	GO:0000271	polysaccharide biosynthetic process	5/36	78/18866	3.61737e-07	2.4142e-05	1.72674e-05	5
	GO:0036293	response to decreased oxygen levels	8/36	371/18866	3.87888e-07	2.48087e-05	1.77442e-05	8
	GO:0034637	cellular carbohydrate biosynthetic process	5/36	86/18866	5.90236e-07	3.62405e-05	2.59207e-05	5
	GO:0070482	response to oxygen levels	8/36	396/18866	6.35141e-07	3.74978e-05	2.68199e-05	8
	GO:1900371	regulation of purine nucleotide biosynthetic process	4/36	42/18866	1.18664e-06	6.74629e-05	4.82522e-05	4
	GO:0030808	regulation of nucleotide biosynthetic process	4/36	43/18866	1.30658e-06	6.96095e-05	4.97876e-05	4
	GO:0019217	regulation of fatty acid metabolic process	5/36	101/18866	1.3151e-06	6.96095e-05	4.97876e-05	5
	GO:0044275	cellular carbohydrate catabolic process	4/36	46/18866	1.72066e-06	8.80406e-05	6.29702e-05	4
	GO:0071456	cellular response to hypoxia	6/36	208/18866	2.46996e-06	0.000122303	8.74761e-05	6
	GO:0010906	regulation of glucose metabolic process	5/36	121/18866	3.21125e-06	0.000150716	0.000107798	5
	GO:0036294	cellular response to decreased oxygen levels	6/36	218/18866	3.24015e-06	0.000150716	0.000107798	6
	GO:0010675	regulation of cellular carbohydrate metabolic process	5/36	148/18866	8.60344e-06	0.00038842	0.000277814	5
	GO:0006090	pyruvate metabolic process	5/36	152/18866	9.7946e-06	0.000429563	0.000307241	5
	GO:0060538	skeletal muscle organ development	5/36	168/18866	1.59059e-05	0.000678208	0.000485082	5
	GO:0062012	regulation of small molecule metabolic process	7/36	456/18866	2.09382e-05	0.000868654	0.000621297	7
	GO:0010565	regulation of cellular ketone metabolic process	5/36	189/18866	2.8037e-05	0.00113255	0.000810043	5
	GO:0006109	regulation of carbohydrate metabolic process	5/36	210/18866	4.6381e-05	0.00182551	0.00130568	5
	GO:0051354	negative regulation of oxidoreductase activity	3/36	41/18866	6.47123e-05	0.00248333	0.00177618	3
	GO:0051341	regulation of oxidoreductase activity	4/36	117/18866	7.09931e-05	0.00265791	0.00190105	4
	GO:1900542	regulation of purine nucleotide metabolic process	4/36	121/18866	8.09114e-05	0.00295712	0.00211505	4
	GO:0006140	regulation of nucleotide metabolic process	4/36	123/18866	8.62319e-05	0.00307828	0.00220171	4
	GO:0046031	ADP metabolic process	4/36	124/18866	8.89855e-05	0.00310438	0.00222038	4
	GO:0006631	fatty acid metabolic process	6/36	396/18866	9.41062e-05	0.00321007	0.00229597	6
	GO:0009150	purine ribonucleotide metabolic process	6/36	401/18866	0.000100818	0.00336426	0.00240626	6
	GO:0060537	muscle tissue development	6/36	409/18866	0.000112348	0.00366922	0.00262438	6
	GO:0006165	nucleoside diphosphate phosphorylation	4/36	133/18866	0.000116732	0.00368505	0.0026357	4
	GO:0009259	ribonucleotide metabolic process	6/36	416/18866	0.000123276	0.00368505	0.0026357	6
	GO:0046939	nucleotide phosphorylation	4/36	135/18866	0.000123662	0.00368505	0.0026357	4
	GO:0042180	cellular ketone metabolic process	5/36	260/18866	0.000127159	0.00368505	0.0026357	5
	GO:0009135	purine nucleoside diphosphate metabolic process	4/36	136/18866	0.000127236	0.00368505	0.0026357	4
	GO:0009179	purine ribonucleoside diphosphate metabolic process	4/36	136/18866	0.000127236	0.00368505	0.0026357	4
	GO:0009185	ribonucleoside diphosphate metabolic process	4/36	139/18866	0.000138411	0.00393445	0.00281408	4
	GO:0019693	ribose phosphate metabolic process	6/36	427/18866	0.000142146	0.00396716	0.00283747	6
	GO:0002931	response to ischemia	3/36	55/18866	0.000156367	0.00428612	0.00306561	3
	GO:0019320	hexose catabolic process	3/36	56/18866	0.000165001	0.00444346	0.00317814	3
	GO:0006163	purine nucleotide metabolic process	6/36	442/18866	0.000171504	0.00453895	0.00324644	6
	GO:0009132	nucleoside diphosphate metabolic process	4/36	155/18866	0.000210371	0.0054732	0.00391466	4
	GO:0007519	skeletal muscle tissue development	4/36	158/18866	0.000226384	0.00579165	0.00414242	4
	GO:0072521	purine-containing compound metabolic process	6/36	472/18866	0.000244589	0.00615482	0.00440218	6
	GO:0043467	regulation of generation of precursor metabolites and energy	4/36	162/18866	0.000249078	0.0061667	0.00441067	4
	GO:0046365	monosaccharide catabolic process	3/36	66/18866	0.00026884	0.00643551	0.00460294	3
	GO:0006012	galactose metabolic process	2/36	13/18866	0.000272513	0.00643551	0.00460294	2
	GO:0043201	response to leucine	2/36	13/18866	0.000272513	0.00643551	0.00460294	2
	GO:0042762	regulation of sulfur metabolic process	2/36	14/18866	0.000317551	0.00722145	0.00516507	2
	GO:0046321	positive regulation of fatty acid oxidation	2/36	14/18866	0.000317551	0.00722145	0.00516507	2
	GO:0009152	purine ribonucleotide biosynthetic process	4/36	173/18866	0.000319908	0.00722145	0.00516507	4
	GO:0001659	temperature homeostasis	4/36	174/18866	0.000326992	0.00727438	0.00520293	4
	GO:2001235	positive regulation of apoptotic signaling pathway	4/36	183/18866	0.000395909	0.00868172	0.00620952	4
	GO:0006086	acetyl-CoA biosynthetic process from pyruvate	2/36	16/18866	0.000417744	0.00897608	0.00642006	2
	GO:0009260	ribonucleotide biosynthetic process	4/36	186/18866	0.000421028	0.00897608	0.00642006	4
	GO:2000811	negative regulation of anoikis	2/36	17/18866	0.000472875	0.00994334	0.00711188	2
	GO:0046390	ribose phosphate biosynthetic process	4/36	194/18866	0.000493566	0.0102382	0.00732275	4
	GO:0006164	purine nucleotide biosynthetic process	4/36	197/18866	0.000522932	0.0105619	0.00755427	4
	GO:0009749	response to glucose	4/36	197/18866	0.000522932	0.0105619	0.00755427	4
	GO:0009746	response to hexose	4/36	202/18866	0.000574615	0.011455	0.00819307	4
	GO:0042594	response to starvation	4/36	206/18866	0.000618502	0.0121718	0.00870578	4
	GO:0034284	response to monosaccharide	4/36	207/18866	0.000629836	0.012238	0.00875309	4
	GO:0072522	purine-containing compound biosynthetic process	4/36	208/18866	0.000641317	0.0123053	0.00880123	4
	GO:2001169	regulation of ATP biosynthetic process	2/36	20/18866	0.00065826	0.0124744	0.00892223	2
	GO:0006094	gluconeogenesis	3/36	91/18866	0.000690756	0.0129306	0.0092485	3
	GO:0019319	hexose biosynthetic process	3/36	94/18866	0.000759182	0.0140403	0.0100422	3
	GO:0006085	acetyl-CoA biosynthetic process	2/36	22/18866	0.000798388	0.0145896	0.0104351	2
	GO:0120162	positive regulation of cold-induced thermogenesis	3/36	97/18866	0.000831784	0.015021	0.0107437	3
	GO:0043255	regulation of carbohydrate biosynthetic process	3/36	99/18866	0.000882555	0.0157526	0.0112669	3
	GO:0046364	monosaccharide biosynthetic process	3/36	100/18866	0.000908662	0.0160321	0.0114668	3
	GO:2000209	regulation of anoikis	2/36	24/18866	0.000951632	0.0165995	0.0118726	2
	GO:0009743	response to carbohydrate	4/36	233/18866	0.000979275	0.0168897	0.0120802	4
	GO:0007517	muscle organ development	5/36	407/18866	0.000990702	0.016897	0.0120854	5
	GO:0042593	glucose homeostasis	4/36	245/18866	0.00117936	0.0192815	0.0137909	4
	GO:0033500	carbohydrate homeostasis	4/36	246/18866	0.00119723	0.0192815	0.0137909	4
	GO:0002026	regulation of the force of heart contraction	2/36	27/18866	0.00120588	0.0192815	0.0137909	2
	GO:0006735	NADH regeneration	2/36	27/18866	0.00120588	0.0192815	0.0137909	2
	GO:0061621	canonical glycolysis	2/36	27/18866	0.00120588	0.0192815	0.0137909	2
	GO:0061718	glucose catabolic process to pyruvate	2/36	27/18866	0.00120588	0.0192815	0.0137909	2
	GO:0019216	regulation of lipid metabolic process	5/36	431/18866	0.00127836	0.0202297	0.0144691	5
	GO:0061620	glycolytic process through glucose-6-phosphate	2/36	28/18866	0.00129709	0.0203166	0.0145313	2
	GO:0043200	response to amino acid	3/36	114/18866	0.00132678	0.0205718	0.0147138	3
	GO:0006096	glycolytic process	3/36	115/18866	0.00136054	0.0208843	0.0149373	3
	GO:0061615	glycolytic process through fructose-6-phosphate	2/36	29/18866	0.0013915	0.0209909	0.0150136	2
	GO:0006757	ATP generation from ADP	3/36	116/18866	0.00139484	0.0209909	0.0150136	3
	GO:0048732	gland development	5/36	443/18866	0.00144348	0.021512	0.0153863	5
	GO:0005979	regulation of glycogen biosynthetic process	2/36	30/18866	0.0014891	0.021736	0.0155464	2
	GO:0010962	regulation of glucan biosynthetic process	2/36	30/18866	0.0014891	0.021736	0.0155464	2
	GO:0010822	positive regulation of mitochondrion organization	3/36	119/18866	0.00150098	0.021736	0.0155464	3
	GO:0009165	nucleotide biosynthetic process	4/36	266/18866	0.00159595	0.0228951	0.0163755	4
	GO:1901293	nucleoside phosphate biosynthetic process	4/36	269/18866	0.00166283	0.0236338	0.0169039	4
	GO:0046320	regulation of fatty acid oxidation	2/36	32/18866	0.00169385	0.0238538	0.0170612	2
	GO:0022898	regulation of transmembrane transporter activity	4/36	276/18866	0.00182647	0.0254876	0.0182298	4
	GO:0043276	anoikis	2/36	34/18866	0.00191125	0.0264303	0.018904	2
	GO:0001101	response to acid chemical	3/36	132/18866	0.00201921	0.027503	0.0196713	3
	GO:0097009	energy homeostasis	2/36	35/18866	0.00202465	0.027503	0.0196713	2
	GO:0071333	cellular response to glucose stimulus	3/36	134/18866	0.0021076	0.0280916	0.0200923	3
	GO:0042326	negative regulation of phosphorylation	5/36	484/18866	0.00212825	0.0280916	0.0200923	5
	GO:0006007	glucose catabolic process	2/36	36/18866	0.00214118	0.0280916	0.0200923	2
	GO:0070873	regulation of glycogen metabolic process	2/36	36/18866	0.00214118	0.0280916	0.0200923	2
	GO:0071331	cellular response to hexose stimulus	3/36	136/18866	0.00219838	0.0285623	0.0204289	3
	GO:0032409	regulation of transporter activity	4/36	291/18866	0.00221427	0.0285623	0.0204289	4
	GO:0071326	cellular response to monosaccharide stimulus	3/36	137/18866	0.00224467	0.028713	0.0205367	3
	GO:0006084	acetyl-CoA metabolic process	2/36	38/18866	0.00238357	0.0297462	0.0212757	2
	GO:0032885	regulation of polysaccharide biosynthetic process	2/36	38/18866	0.00238357	0.0297462	0.0212757	2
	GO:0045923	positive regulation of fatty acid metabolic process	2/36	38/18866	0.00238357	0.0297462	0.0212757	2
	GO:0106106	cold-induced thermogenesis	3/36	144/18866	0.00258571	0.0317526	0.0227107	3
	GO:0120161	regulation of cold-induced thermogenesis	3/36	144/18866	0.00258571	0.0317526	0.0227107	3
	GO:0071322	cellular response to carbohydrate stimulus	3/36	145/18866	0.0026369	0.0321241	0.0229765	3
	GO:0006734	NADH metabolic process	2/36	41/18866	0.0027703	0.033222	0.0237617	2
	GO:0030890	positive regulation of B cell proliferation	2/36	41/18866	0.0027703	0.033222	0.0237617	2
	GO:0046034	ATP metabolic process	4/36	311/18866	0.00281541	0.0335012	0.0239614	4
	GO:0010907	positive regulation of glucose metabolic process	2/36	42/18866	0.00290534	0.0343053	0.0245366	2
	GO:0008631	intrinsic apoptotic signaling pathway in response to oxidative stress	2/36	43/18866	0.00304341	0.0356614	0.0255065	2
	GO:0001678	cellular glucose homeostasis	3/36	153/18866	0.00306909	0.0356898	0.0255268	3
	GO:1990845	adaptive thermogenesis	3/36	155/18866	0.00318353	0.0364794	0.0260916	3
	GO:0032881	regulation of polysaccharide metabolic process	2/36	44/18866	0.00318453	0.0364794	0.0260916	2
	GO:0043271	negative regulation of ion transport	3/36	157/18866	0.00330057	0.0375287	0.0268421	3
	GO:0034198	cellular response to amino acid starvation	2/36	45/18866	0.00332866	0.0375698	0.0268714	2
	GO:2001236	regulation of extrinsic apoptotic signaling pathway	3/36	162/18866	0.00360466	0.040388	0.0288872	3
	GO:0009267	cellular response to starvation	3/36	163/18866	0.00366747	0.040794	0.0291775	3
	GO:1990928	response to amino acid starvation	2/36	48/18866	0.00377906	0.0417328	0.029849	2
	GO:0019674	NAD metabolic process	2/36	50/18866	0.00409423	0.0448903	0.0321074	2
	GO:2001238	positive regulation of extrinsic apoptotic signaling pathway	2/36	52/18866	0.00442121	0.0481316	0.0344257	2
	GO:0035384	thioester biosynthetic process	2/36	53/18866	0.0045891	0.0492606	0.0352332	2
	GO:0071616	acyl-CoA biosynthetic process	2/36	53/18866	0.0045891	0.0492606	0.0352332	2
	GO:0019903	protein phosphatase binding	4/36	149/18352	0.000200837	0.0293222	0.0226206	4
	GO:0019902	phosphatase binding	4/36	194/18352	0.00054727	0.0399507	0.03082	4
